# Supplementary material
Source: PubMed Central journal article supplement (PMC3131874)
Supplement: cdd201086x2.pdf [file cdd201086x2.pdf]

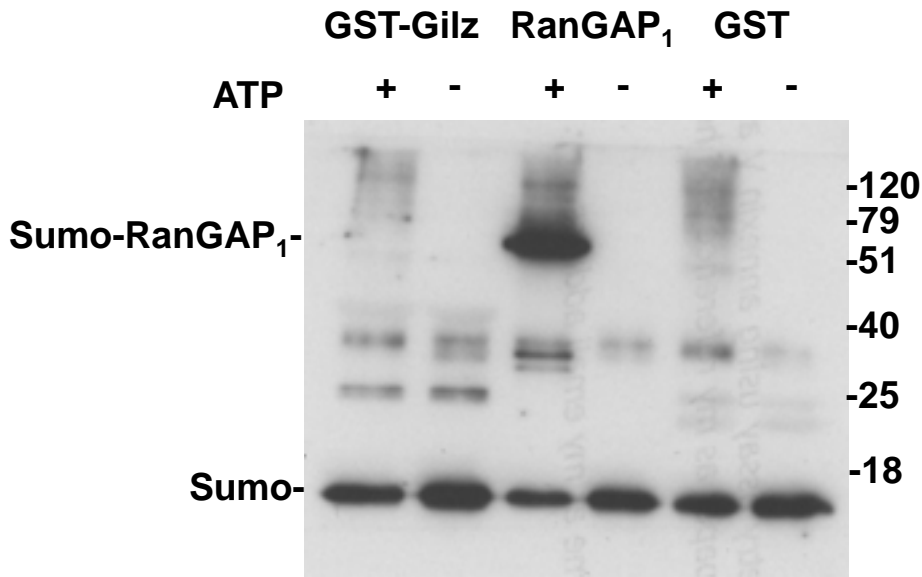

**Supplementary figure 2: In vitro sumoylation reaction.** The SDS gel shows the in vitro sumoylation reaction with GST-Gilz fusion protein with or without ATP (lanes 1 and 2), with the positive control RanGAP<sub>1</sub> (lanes 3 and 4), and with the negative control GST (lanes 5 and 6). Each reaction was performed with (+) or without (-) the ATP necessary to the enzymatic reaction. No differences in sumoylated proteins were seen in the GST-Gilz lanes with (lane 1) or without (lane 2) the ATP or compared to the GST lane 5.

**Method:** In vitro sumoylation was performed using the “SUMOylation Kit” purchased from Enzo Life Sciences. (cat. # UW8955) by following the company instructions. Briefly, assay components (dH<sub>2</sub>O, 10x SUMOylation buffer, 20x Mg-ATP, 20x SUMO E<sub>1</sub>, 20x SUMO E<sub>2</sub>, 20x RG<sub>1</sub>, 20x SUMO<sub>1/2/3</sub>). The target protein was GST-Gilz and the target protein negative control was GST) were added to 0,5 mL eppendorf tubes. Tubes were mixed gently, incubated at 30°C for 60 minutes. Assays were quenched by addition of 20µL 2x SDS-PAGE Gel Loading Buffer and analysed by western blotting.
